1 **Article Summary Line:** Conflict significantly increased the risk of cholera outbreaks in Nigeria  
2 and the Democratic Republic of Congo and pre-existing vulnerabilities and conflict resolution  
3 should be a top priority to protect health.

4 **Running Title:** Conflict and cholera in Nigeria and the DRC

5 **Keywords:** Public Health, Epidemiology, Cholera, Disease Outbreaks, *Vibrio cholerae*, Conflicts

6

7 **Using self-controlled case series to understand the relationship between conflict and cholera**  
8 **in Nigeria and the Democratic Republic of Congo**

9 **Authors:** Gina E C Charnley, Kévin Jean, Ian Kelman, Katy A M Gaythorpe\*\*, Kris A

10 **Murray\*\***

11 **Author affiliations:**

12 Imperial College London, London, UK (G. Charnley, K. Gaythorpe, K. Murray)

13 Laboratoire MESuRS - Cnam Paris, Paris, France (K. Jean)

14 University College London, London, UK (I. Kelman)

15 University of Agder, Norway (I. Kelman)

16 MRC Unit The Gambia at London School of Hygiene and Tropical Medicine, Fajara, The Gambia

17 (K. Murray)

18 \*\* Joint senior author

19

20 **Abstract – 150 words**

21 Cholera outbreaks significantly contribute to disease mortality and morbidity in low-income  
22 countries. Cholera outbreaks have several social and environmental risk factors and extreme  
23 conditions can act as catalysts. A social extreme with known links to infectious disease outbreaks is  
24 conflict, causing disruption to services, loss of income and displacement. Here, we used the self-  
25 controlled case series method in a novel application and found that conflict increased the risk of

26 cholera in Nigeria by 3.6 times and was attributed to 19.7% of cholera outbreaks were attributable  
27 to conflict. In the Democratic Republic of Congo (DRC) the risk cholera was 2.6 times greater and  
28 12.3% were attributable to conflict. Several states/provinces with the strongest relationship were  
29 also areas of high reported conflict. Our results help highlight the importance of rapid and sufficient  
30 assistance during social extremes and the need for pre-existing vulnerabilities such as poverty and  
31 access to healthcare to be addressed.

## 32 **Text – 3464 words**

33 Diarrhoeal diseases are the eighth leading cause of death worldwide, with cholera  
34 contributing significantly, especially in low- and middle-income countries (1). Over 94% of World  
35 Health Organization (WHO) reported cholera cases are in Africa and more research is needed to  
36 understand cholera dynamics on the continent (2). Previous research has found several  
37 environmental and socioeconomic links with cholera, including temperature, precipitation, poverty  
38 and water, sanitation, and hygiene (WASH) (3,4). Furthermore, extremes of these environmental  
39 and social conditions can act as catalysts for outbreaks, such as droughts, floods, and conflicts  
40 (4,5,6).

41 Here, we will focus on the impacts of conflict on cholera outbreaks and compare the results  
42 across two countries in Africa, Nigeria and the Democratic Republic of Congo (DRC) in the past 23  
43 years. Several mechanisms have been suggested through which conflict can lead to infectious  
44 disease outbreaks (7,8,9). During conflicts, services can be disrupted including access to WASH,  
45 disruption of disease control programmes and collapse of health systems (e.g., vaccination  
46 coverage). Those displaced by conflict may also find it difficult to access healthcare (10,11,12).  
47 Populations may not seek medical treatment as they perceive healthcare facilities as unsafe. For  
48 example, during the 2018 Ebola outbreak in the DRC healthcare facilities were attacked, dampening  
49 efforts to control the virus (12). Conflict can worsen pre-existing vulnerabilities including poverty,  
50 as conflicts can cause loss of income, disruption to education, damage to livelihoods and  
51 displacement (13).

52 Nigeria and the DRC share social and environmental similarities, as well as experiencing  
53 cholera outbreaks. Both have active conflicts including the Boko Haram Insurgency in northeastern  
54 Nigeria (14) and political unrest in the eastern DRC (15). They have the second and third highest  
55 numbers of estimated cholera cases per year in Africa, respectively (16), with the Kivu provinces  
56 being the most active cholera foci in the world (17). In addition, Nigeria and the DRC have a  
57 tropical climate, poor access to WASH and a large proportion of the population living in poverty  
58 (<\$1.25/day) at 87.7% for the DRC and 62% for Nigeria (18), which are known cholera risk factors.

59 Few studies have investigated the impacts of conflict on cholera outbreaks, especially  
60 quantitatively. Studies have commonly focused on cholera and conflict in Yemen (8,19), its effect  
61 on vaccination efforts (20) or the impact of conflict on other diseases such as Ebola (12) and  
62 COVID-19 (21). Africa is also a chronically understudied continent in relation to cholera, despite  
63 reporting a large proportion of global cases (2).

64 To bridge this research gap, we used the Self-Controlled Case Series (SCCS) method, both  
65 nationally and sub-nationally and completed a sensitivity analysis to provide insight into the effect  
66 of lag and cholera definition. The SCCS method is used in a novel application and we aim to  
67 understand and promote its use in other contexts (22). Previous uses of the method include testing  
68 the effectiveness of drug and vaccine intervention on an individual (23,24) and population level  
69 (25). Furthermore, we adapted the recently developed percentage attributable fraction (PAF)  
70 equations to the work presented here (25), to understand the proportion of cholera outbreaks  
71 attributable to conflict. Based on these results, we suggest mechanisms for which conflict is driving  
72 cholera and potential risk factors, building on previous research in this area. We hope this  
73 information can be used to strengthen disease prevention in conflict settings and reduce additional  
74 mortality and morbidity in conflicts.

## 75 **Methods**

### 76 ***Datasets***

77 Cholera data were compiled from a range of publicly available sources (WHO disease  
78 outbreak news, ProMED, ReliefWeb, WHO regional office for Africa weekly outbreak and  
79 emergencies, UNICEF cholera platform, EM-DAT, the Nigerian Centre for Disease Control, and a  
80 literature search) in both English and French. The full compiled dataset is available in a GitHub  
81 repository ([https://github.com/GinaCharnley/cholera\\_data\\_drc\\_nga](https://github.com/GinaCharnley/cholera_data_drc_nga)) and additional information on  
82 data collation and validation in a complementary database paper (26). An outbreak was defined by  
83 the onset of a cholera case and the case definitions for the two countries are shown in S1  
84 Information. Conflict data were provided by the United Nations Office for the Coordination of  
85 Humanitarian Affairs Humanitarian Data Exchange, which provides data from the Armed Conflict  
86 Location & Event Data Project (ACLED) (27). The data included sub-national conflict events,  
87 categorised by event type including battles, explosions, protests, riots, strategic developments, and  
88 violence against civilians.

89 The spatial granularity of the analysis was to administrative level 1 (states for Nigeria and  
90 provinces for the DRC) and all data points that were reported on a finer spatial scale were  
91 aggregated to the upper level. The study period was specified as January 1997 to May 2020, as  
92 these were the first and last reports in the conflict data. The temporal scale was set to weekly, with  
93 continuous weeks from epidemiological week 1 in 1997 to epidemiological week 20 in 2020 (1-  
94 1,220). Continuous weeks was chosen for compatibility with the model and to include periods of  
95 conflict that endured from one year into the next. Weeks was chosen, rather than days, to account  
96 for reporting lags, as previous work has reported issues in the granularity of data and timeliness of  
97 reporting, especially in humanitarian crises due to different sources of data and logistical difficulties  
98 (28,29). Additional information on the datasets used here are available in S2 Information.

### 99 ***Model Structure and Fitting***

100 The SCCS method investigates the association between an exposure and an outcome event.  
101 The aim is to estimate the effect, by comparing the relative incidence of the adverse events  
102 (outbreaks) within an exposure period of hypothesised excess risk (conflicts), compared to all other

103 times (peace, according to the dataset used). The SCCS method is a case only method and has the  
104 advantage of not needing separate controls, by automatically controls for fixed cofounders that  
105 remain constant over the observational period (30,31).

106 Both the event and exposure were set as binary outcomes, either being present (1) or not (0).  
107 The observation period was the full study period (1-1,220). The exposure period was the first week  
108 after conflict onset and was reported as multiple onsets, not one long exposure period. The event  
109 was defined by the week the cholera outbreaks was reported. Each event and exposure that occurred  
110 in the same state/province were designated an identification number and a pre-exposure, exposure,  
111 and post exposure period (see S1 and S2 Tables).

112 The data was fit to conditional logistic regression models, using the event (cholera outbreak  
113 onset) as the outcome variable (function clogit(), R package “survival”) (32). As is standard for  
114 conditional logistic regression, the interval between the exposure to un-exposure period was offset  
115 (coefficient value of 1) in the model and the identification numbers were stratified. The model  
116 coefficient values were used to calculate incidence rate ratio (IRR), to understand the magnitude in  
117 which conflict increased the risk of cholera outbreaks.

118 The datasets for each country were then split by state/province and the analysis repeated for  
119 each, to understand if the significance of conflict on cholera outbreaks varied by sub-national  
120 location and if conflict was more important in some states/provinces compared to others. All  
121 statistical analyses were carried out in R version 3.6.2 and the threshold for significance was  
122  $p < 0.05$ .

### 123 ***Sensitivity Analysis***

124 A sensitivity analysis was used to test different methods of defining the exposure end point,  
125 which was set to one week in the main analysis, and 2, 4, 6, 8 and 10 weeks in the sensitivity  
126 analysis. The aim was to allow for further understanding of how long after a conflict event the risk  
127 of cholera is heightened. Full information is shown in S3 Information and S1 and S2 Figs.

128 An additional sensitivity analysis was completed to understand the effect of altering the  
129 cholera outbreak definition and to test for the presence of temporal autocorrelation and involved  
130 two scenarios. Scenario 1 removed all outbreaks within 2 weeks of each other (based on cholera  
131 biology, <10 days shedding the bacteria + <5 days incubation period) (33,34). Scenario 2 was an  
132 extreme scenario to fully test model robustness and removed all outbreaks within 6 months of each  
133 other.

#### 134 *Percentage Attributable Fraction*

135 The recently developed percentage attributable fraction (PAF) equations (30) were adapted  
136 to the model results found here (full equations in S4 Information). The PAF values estimate the  
137 percentage of outbreaks that could be attributed to conflict at a national level, using the full  
138 observation period of the datasets and the IRR values from the model results. Bootstrap resampling  
139 (1,000 samples) was used to obtain 95% confidence intervals. For each sample, a value of IRR was  
140 randomly sampled based on the parameters estimated in the SCCS analysis.

141

## 142 **Results**

### 143 *Conflict and Cholera Occurrence*

144 The distribution of conflict and cholera in Nigeria and the DRC in the datasets used here is  
145 shown temporally and spatially in Figure 1. The data shows an increase in reported conflict and  
146 cholera, especially after 2010 (Figure 1a-b) and a large proportion of the cholera cases have been  
147 reported in conflict-stricken areas (Figure 1c).

148

149

150

151

152

153

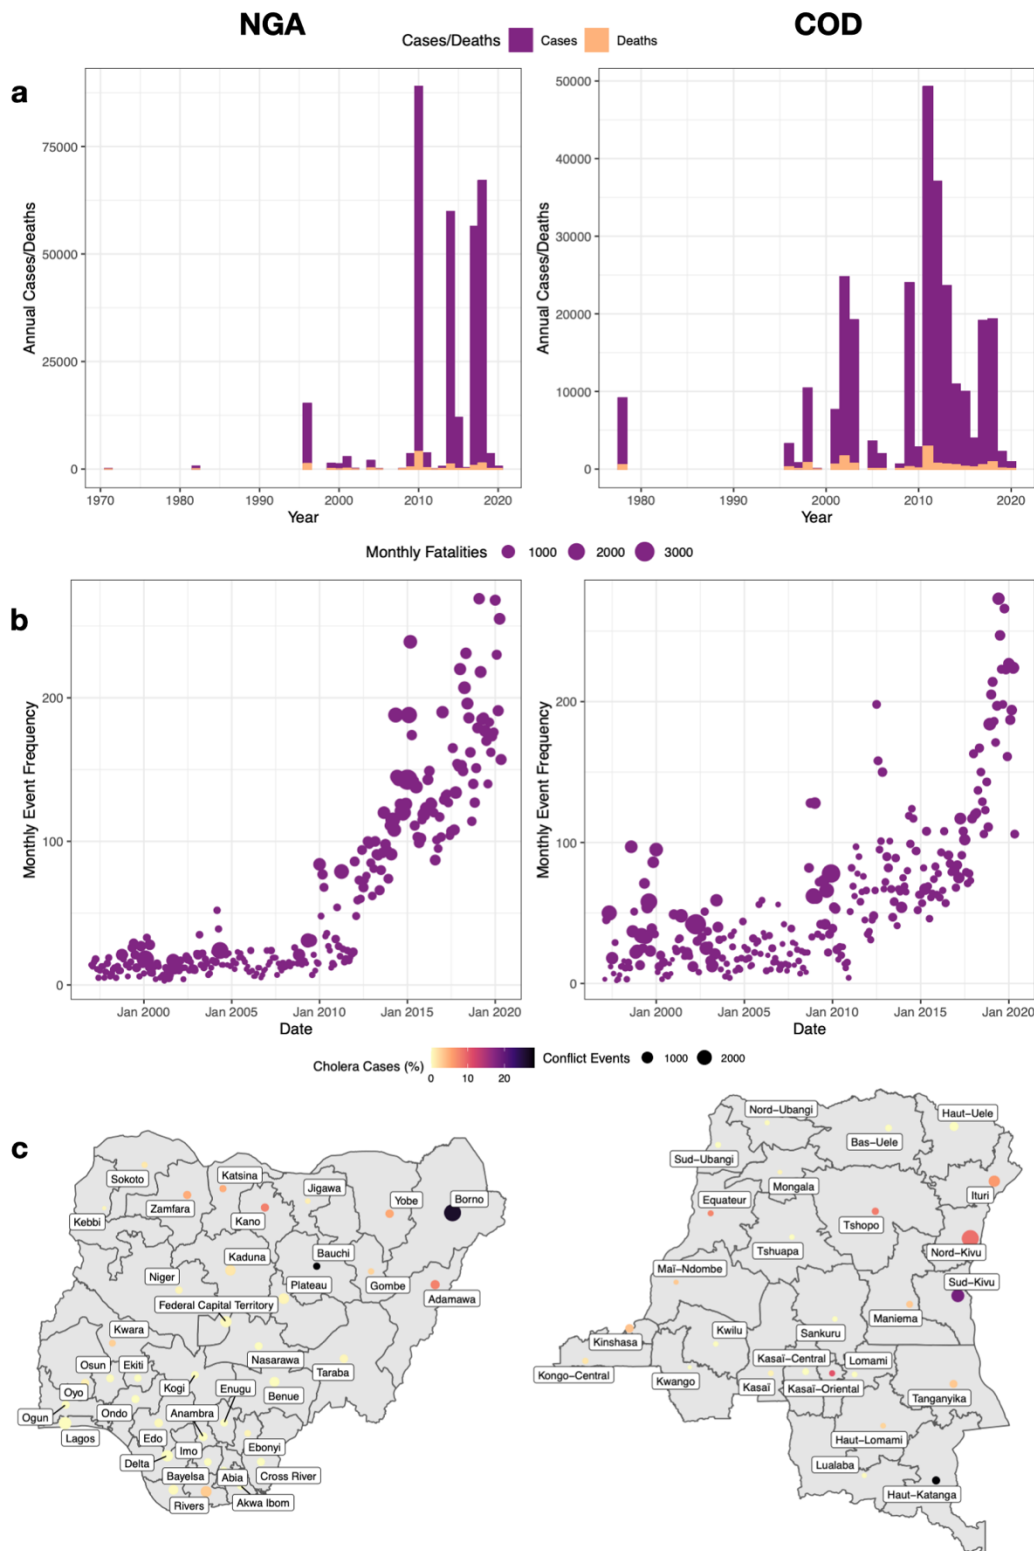

154 **Figure 1. Changes in cholera and conflict for the full datasets. a, monthly cholera cases and**  
 155 **deaths, b, monthly frequency of conflict events and fatalities and c, the number of conflict events**  
 156 **and cholera cases as a percentage of the total number of national cases by administrative level 1 for**  
 157 **Nigeria (NGA) and the Democratic Republic of Congo (COD).**

158 The total number of conflicts and outbreaks for each state/province during the study period  
 159 is shown below in Figure 2 and totaled 4,639 conflict and 396 cholera outbreaks for the DRC and in  
 160 Nigeria, 8,190 conflicts and 782 cholera outbreaks. The outbreak distribution applied satisfactorily  
 161 to the Poisson probability distribution (S3 Figure).

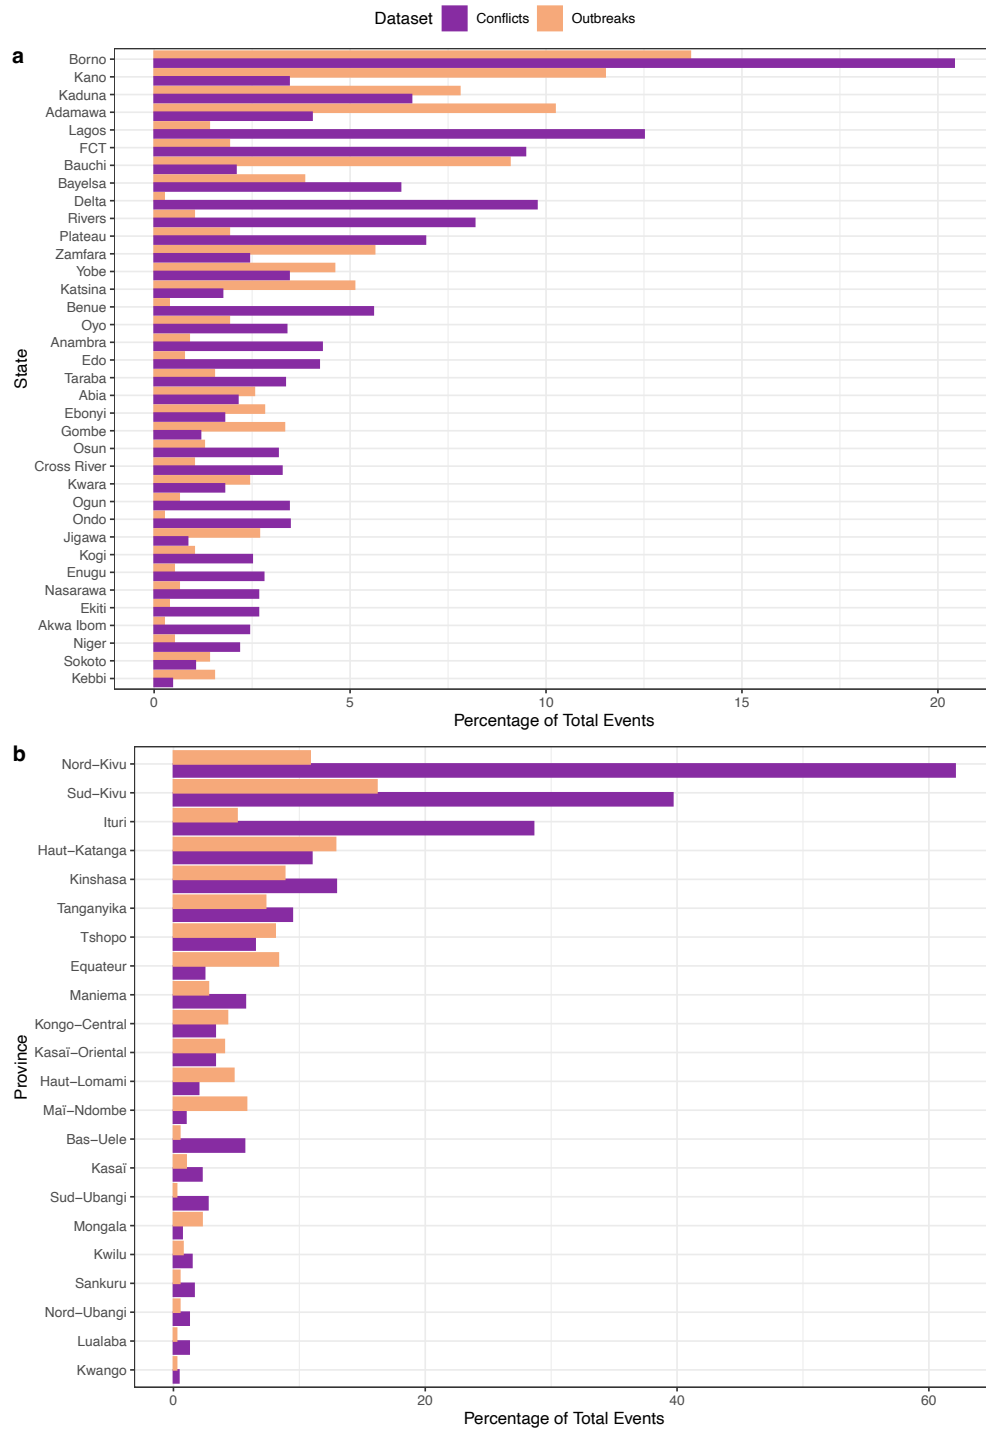

162 **Figure 2. Percentage of events in each dataset including conflict and outbreaks.** For **a**, Nigeria  
 163 and **b**, the Democratic Republic of Congo by administrative level 1. FCT - Federal Capital  
 164 Territory.



165 To be included in the analysis, the state/province had to report both outbreaks and conflicts

166 during the study period, states/provinces which exclusively reported conflicts (and not any

167 outbreaks) were excluded, as the SCCS methodology is a case-only approach. As such, 22

168 provinces were included for the DRC and 36 states for Nigeria (states and provinces excluded are

169 shown in S5 Information). The temporal distribution of the exposure periods and outbreaks included

170 in the SCCS model for each state/province is shown in Figure 3.

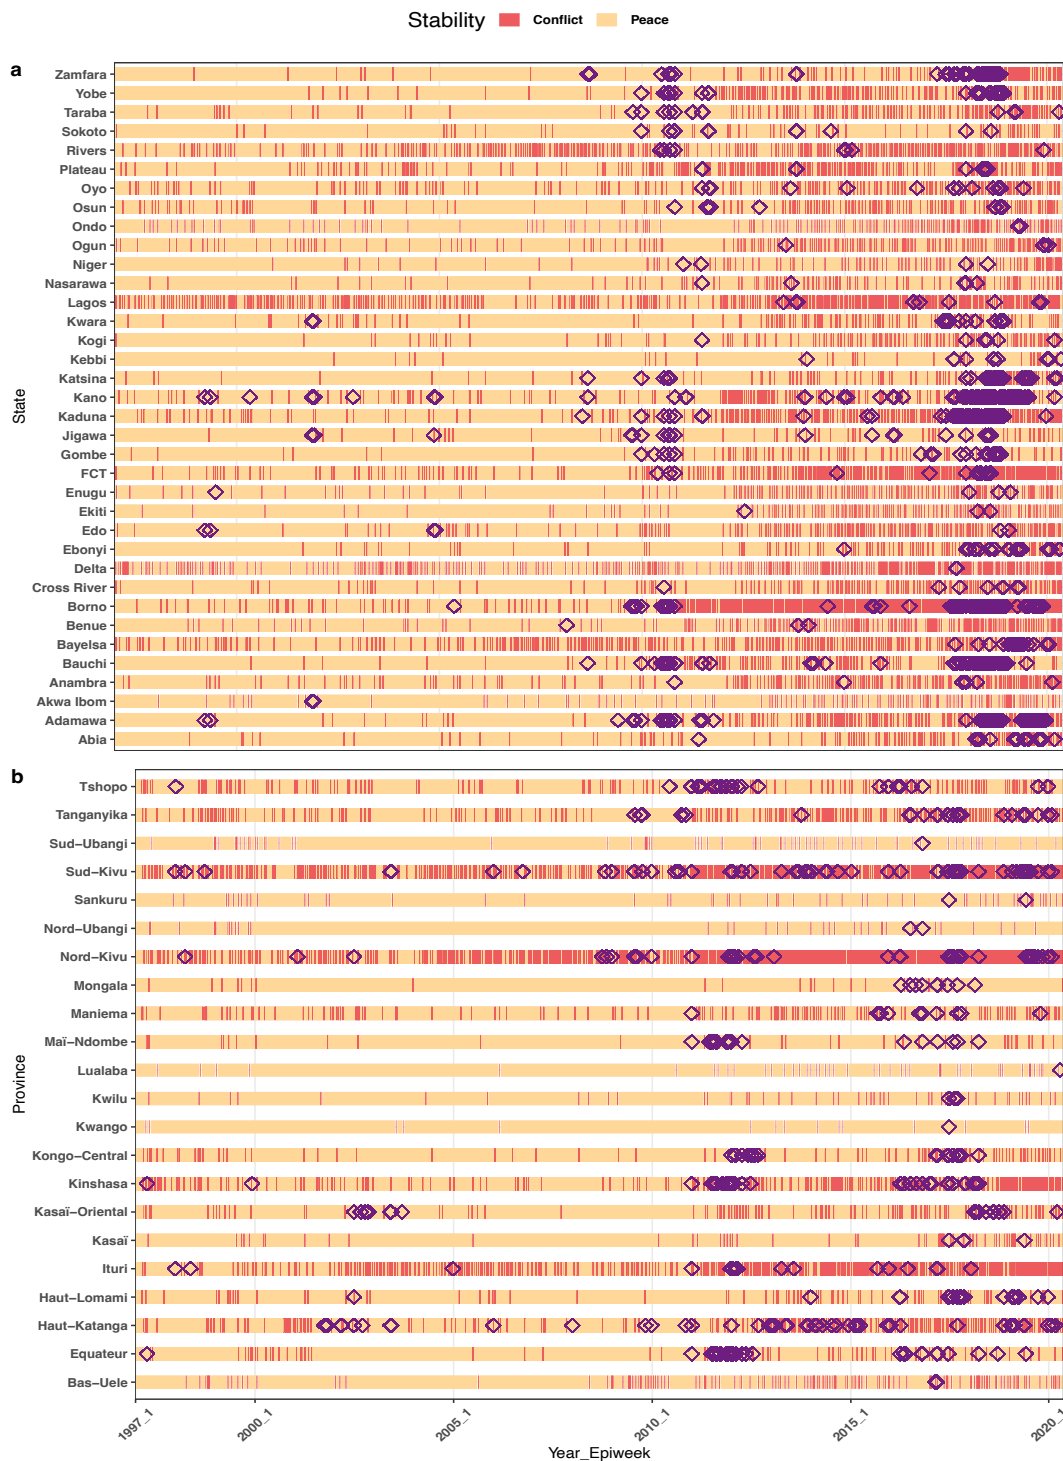

171 **Figure 3. Swimmer plots showing the conflict exposure period in the SCCS model.** The conflict  
172 periods are set to 1 week after the onset and the purple diamonds represent weeks where outbreaks  
173 were reported for each state/province for **a**, Nigeria and **b**, the Democratic Republic of Congo.

#### 174 ***Model Output***

175 Conflict significantly increased the rate of cholera outbreaks (IRR) in the past 23 years in  
176 Nigeria and the DRC ( $p < 0.05$ ). Nigeria showed an effect of greater magnitude, increasing the risk  
177 of cholera outbreaks by up to 3.6 times (IRR = 3.6, 95%CI = 3.3-3.9). Whereas for the DRC, the  
178 risk was increased by 2.6 times (IRR = 2.6, 95%CI = 2.3-2.9).

179 Of the 36 Nigerian states included in the analysis, 24 showed statistically significant  
180 associations between conflict and cholera outbreaks. The strongest effect was found in Kebbi,  
181 Lagos, Osun, Borno and Nasarawa, with IRR values ranging from 6.8 to 6.2 (Figure 4a).

182 Eleven out of 22 DRC provinces included in the analysis showed a statistically significant  
183 relationship between conflict and cholera. Tanganyika, Kasai-Oriental, Maniema, Nord-Kivu and  
184 Kasai found the strongest values and some were the highest values found in the analysis. In  
185 Tanganyika, conflict increased cholera outbreak rate by 7.5 times and 3.7 times for Kasai (Figure  
186 4b).

#### 187 ***Sensitivity Analysis***

188 The effect of conflict on cholera outbreaks at a national and sub-national level for both  
189 Nigeria and the DRC decreased with increasing exposure period. The decrease in IRR from week 1  
190 to week 10 was from 3.6 to 2.08 for Nigeria and 2.6 to 1.5 for the DRC. By week 6 the change was  
191 minimal and plateaued or increased (full results in S4 and S5 Figs).

192 Changing the outbreak onset definition yielded similar results to the original analysis.  
193 Removing events within both 2 weeks and 6 months of each other found IRR values within the  
194 confidence interval of the initial definition. All results remained significant at  $p < 0.05$  and provides  
195 evidence that temporal autocorrelation did not impact model robustness. See S6 Figure for the full  
196 results of the sensitivity analysis.

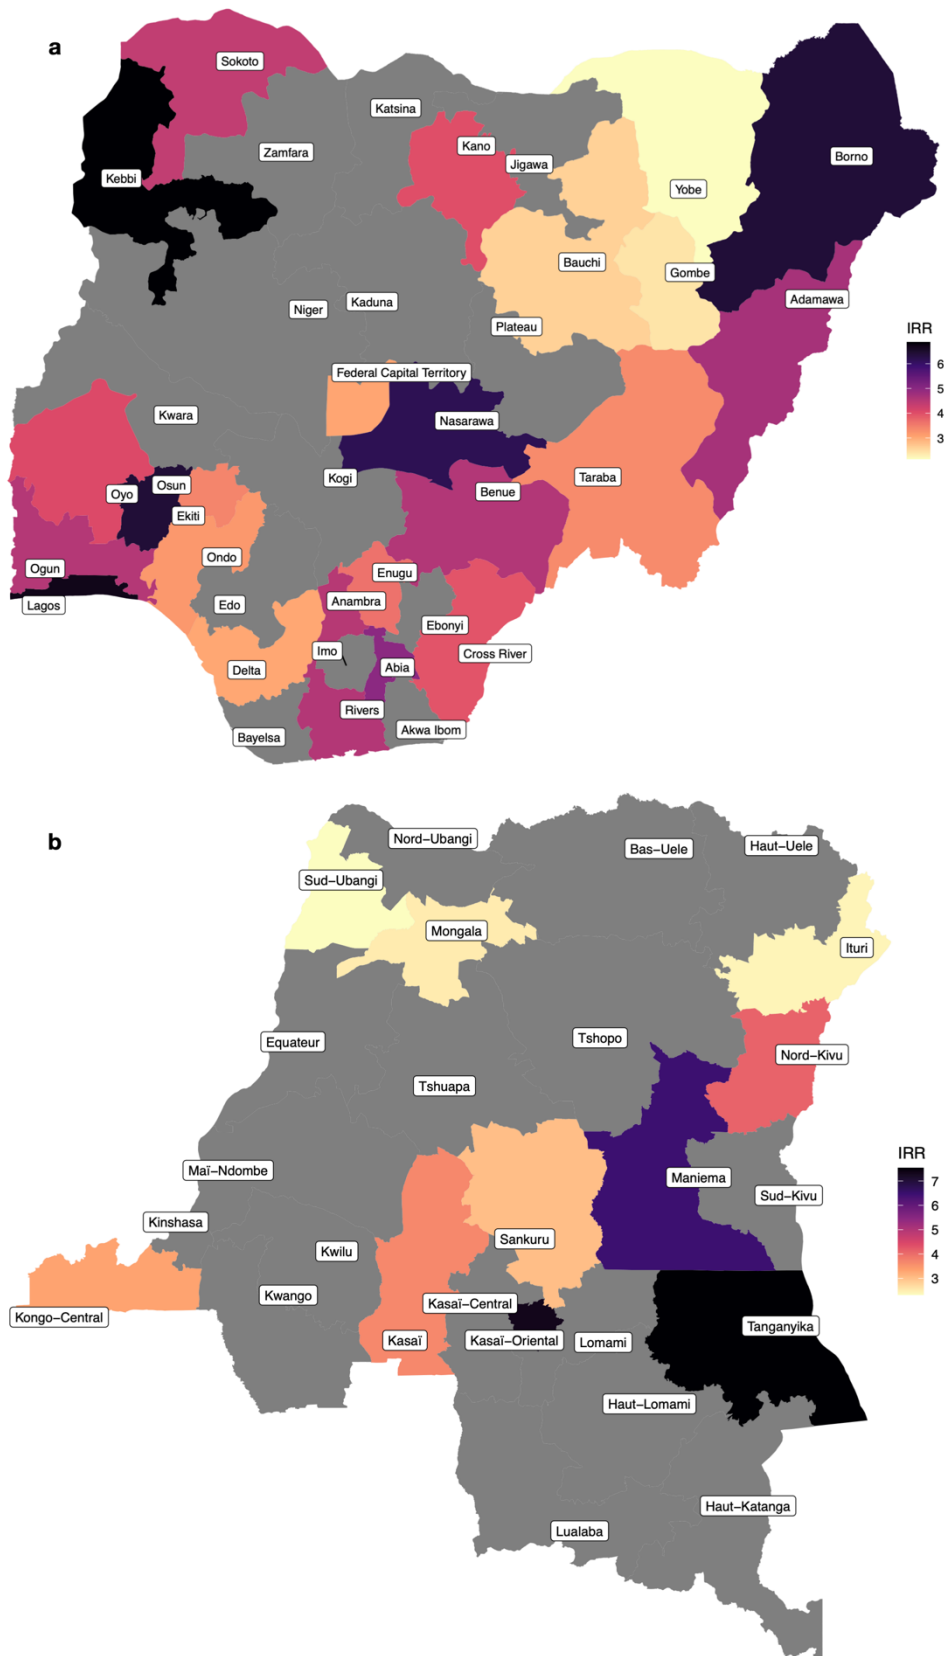

197 **Figure 4. Incidence rate ratio (IRR) for the effect of exposure to conflict within one week of**  
 198 **the event and cholera at a sub-national level. For a, Nigeria and b, the Democratic Republic of**  
 199 **Congo. Only results that were significant at the threshold  $p < 0.05$  are plotted here.**

200

201 ***Percentage Attributable Fraction***

202           Based on the randomly resampled IRR values (1,000 samples) from the model results (3.6  
203 for Nigeria and 2.6 for the DRC), the onset of a conflict event during epidemiological week 1 in  
204 1997 to week 20 in 2020, was attributable to 19.7% (95%CI = 18.2%-21.2%) of cholera outbreaks  
205 in Nigeria and 12.3% (95%CI = 10.2%-14.4%) for the DRC.

206  
207 **Discussion**

208           Conflict events increased the rate of cholera outbreaks by 3.6 times in Nigeria and 2.6 times  
209 in the DRC. The percentage of cholera outbreaks attributable to the conflicts during the period of  
210 1997 to 2020 (1,220 continuous weeks) was 19.7% for Nigeria and 12.3% for the DRC. The  
211 states/provinces with the highest increased risk were Kebbi, Nigeria at 6.9 times and Kasai-Oriental,  
212 the DRC at 7.3 times. This showed that in some states/provinces, the effect of conflict was much  
213 greater than the national level.

214           The sensitivity analysis evaluating the effect of lag showed a decrease in effect as the weeks  
215 progressed, with some states/provinces seeing a plateau or increase around 6 weeks after the event.  
216 The decrease with the lag duration may be a “diluting” effect, as the probability of an outbreak will  
217 increase across a longer period. The states/provinces that increased after week 6, were often those  
218 with the strongest initial effect, especially in the DRC. This larger initial effect may have a longer  
219 lasting impact, potentially due to conflict severity, while the IRR values of more than 1 (2.08  
220 Nigeria and 1.5 for the DRC) even at 10 weeks after the conflict suggest the impacts are long  
221 lasting.

222           States/provinces with the greatest increased rates of cholera often coincided with areas of  
223 high conflict. This provides further evidence to the hypothesis that conflict may be a driver of  
224 cholera in Nigeria and the DRC. States/provinces surrounding high conflict areas were also highly  
225 significant areas (e.g., Abia, Ogun, Osun, Maniema, and Tanganyika), showing a potential spill-  
226 over effect. The states/provinces here were studied independently but a possible explanation may be

227 people fleeing areas of conflict or a cholera outbreak to neighbouring states, as displacement is a  
228 known risk factor for disease outbreaks (9). This is especially important for cholera, as a large  
229 proportion of people will be asymptomatic but can still shed the pathogen into local reservoirs,  
230 which displaced populations may use as drinking water due to a lack of alternatives (33).

231 Cholera outbreaks can be explosive and self-limiting, due to the high number of  
232 asymptomatic individuals, diluting the susceptible pool (33). This potentially explains why the  
233 impacts of conflict on cholera was seen just one week after the event. The incubation period of  
234 cholera is short (34), making the effect within the first week found here biologically possible for the  
235 pathogen and a realistic timeframe for elevated exposure to manifest in cases. Other examples of  
236 cholera cases emerging within the first week after an adverse event include Cyclone Thane hitting  
237 the Bay of Bengal (35), water supply interruption in the DRC (36) and Cyclone Aila in West Bengal  
238 (37). This provides further evidence of the need for quick and effective aid in humanitarian crisis to  
239 avoid outbreaks and reduce mortality (38).

240 Healthcare facilities can suffer in periods of conflict and cholera outbreaks can overwhelm  
241 systems, a potential cause of the relationship between conflict and cholera shown here. Care can be  
242 inaccessible because of direct infrastructure damage or difficulties getting to the facilities due to  
243 impromptu roadblocks (39). Supplies may be stolen and/or unable to be delivered, including oral  
244 rehydration solution (ORS), pathogen-sensitive antibiotics and oral cholera vaccines, which are  
245 important for cholera outbreak control and mortality (40). Finally, safety is a serious issue, both for  
246 healthcare workers and patients and non-governmental (NGO) organisations can withdraw from  
247 these areas, citing an inability to ensure the safety of their staff (41). Steps need to be taken globally  
248 to reduce this violence, such as using active clinical management for all patients to enhance the  
249 acceptance of pathogen-specific treatment centres (42).

250 Conflict has the potential to worsen pre-existing vulnerabilities, which can exacerbate  
251 poverty, another potential cause of the effect of conflict on cholera. The impacts of poverty can be  
252 far reaching and is a known risk factor for cholera (4,43), along with other diseases (44). For

253 example, poor urban settlements have faced the brunt of outbreaks including Zika, Ebola, typhoid,  
254 and cholera, due to crowding and poor access to WASH (45). Those in poorer communities may  
255 also have more contacts and greater transmission, creating a vicious cycle (44). Conflict can result  
256 in loss of possessions, habitual residence, and an inability to find employment, reducing income  
257 generation, savings and financial backstops (13). In times of worsening poverty, people may not be  
258 able to afford healthcare and basic medical supplies, especially in vulnerable groups. This  
259 disruption to daily life can cause many more deaths than direct battlefield fatalities and leads to  
260 stagnation in development (46).

261 A lack of WASH facilities is likely to have contributed to the positive relationship between  
262 cholera and conflict found here. Although WASH and poverty were not directly evaluated, their  
263 effects are likely to have been important. Conflict events can lead to disruption in sanitation and  
264 hygiene and adverse events can act as catalysts in the interaction of contaminated water and the  
265 human populations (3). Displacement from conflict can cause issues in accessing WASH (e.g.,  
266 latrine access, soap availability) and several displacement camps have seen rapid cholera outbreaks,  
267 including the DRC after the Rwandan genocide in 1994 (2). If people are displaced due to conflict,  
268 this may result in the use of water contaminated with toxigenic strains of *Vibrio cholerae* because  
269 alternatives are lacking, leading to outbreaks.

270 A potential limitation of this analysis is the confounding effect of waterbodies in the most  
271 significant states/provinces including the Lake Chad basin in Nigeria and the African Great Lakes  
272 Region in the DRC. Water is considered fundamental in cholera transmission (47), although no  
273 study has yet demonstrated a long-term persistence of toxigenic *Vibrio cholerae* in African lakes  
274 (48). Understanding these additional environmental factors including seasonal weather changes and  
275 the pre-existing vulnerabilities discussed is very important, although beyond the scope of the  
276 methods used here which investigate conflict in isolation.

277 Underreporting, overreporting and a reporting lag may have impacted the degree of effect  
278 found here. Underreporting is a significant issue in global cholera and conflict estimates, due to

279 asymptomatic cases, disincentives to report and logistical issues (29,49). Cholera surveillance is  
280 difficult in conflicts, due to displaced populations and security issues. Additionally, our  
281 methodology may have resulted in a classification bias, underestimating of the effect of conflict on  
282 cholera. If a cholera outbreak was “imported” from a neighbouring state/province (spatial  
283 autocorrelation), this would be classified as a genuine, autochthonous event, which would likely be  
284 non-differential (likely to happen during an exposed or non-exposed period). Alternatively, during  
285 times of conflict health surveillance can be enhanced by the government and/or NGOs. Reporting  
286 delay is another potential problem and some national reporting delays, have been found to range  
287 from 12 days for meningococcal disease to 40 days for pertussis (28).

288 States which reported conflict but no cholera outbreaks were removed, as the SCCS model  
289 is a case-only approach. Analysing cases only, instead of the corresponding complete cohort,  
290 translates into a loss of efficiency, but previous work showed that this loss is small, especially when  
291 the fraction of the sample experiencing the exposure is high. Moreover, this loss of efficiency must  
292 be weighed against a better control of time-invariant confounders. Previous examples illustrated  
293 that the SCCS design is likely to produce more trustful results than the corresponding cohort  
294 analysis, especially when a strong residual confounding bias is likely (30,31).

295 The severity or intensity of both the conflict and cholera outbreaks were not evaluated here,  
296 as a binary variable was used. Conflict severity is complex, far-reaching and challenging to  
297 measure. Making assessments and assumptions of how a conflict event impacts a health outcome is  
298 difficult and involve assumptions and oversimplifications. Although beyond the scope of this work,  
299 it is an important area of future qualitative research with those working in a variety of different  
300 organizations in the conflict-affected areas.

301 Despite the limitations of conflict and cholera data, the data used here are to the highest  
302 standard currently available and has been used by several other studies, making the research  
303 comparable (11,12). Additionally, several methods of validating the cholera data were used (26).  
304 Creating partnerships with those working on the ground and exploring more sensitive data options

305 is an area of future research. Additional methods to account for data limitations included setting  
306 both the event and the exposure to a binary outcome to reduce the impacts of severity and using a  
307 weekly instead of daily temporal scale to account for delays.

308 In summary, our analysis shows a clear relationship between cholera and conflict in both  
309 Nigeria and the DRC, with conflict increasing the rate of cholera by up to 7.3 times in some  
310 states/provinces. The flexibility of SCCS and conditional logistic regression models make future  
311 work evaluating different diseases, countries and additional risk factors relatively simple. Cholera  
312 risks are likely multi-factorial and complex but sufficient and rapid support, along with enhanced  
313 efforts to build community trust can reduce this access risk. Finding conflict resolution and  
314 addressing pre-existing vulnerabilities (poverty, healthcare and WASH) should be the main priority.  
315 By reducing these vulnerabilities, communities will have greater resources to adapt and reduce  
316 vulnerabilities both in times of conflict and peace.

### 317 **Acknowledgements**

318 This work was supported by the Natural Environmental Research Council [NE/S007415/1],  
319 as part of the Grantham Institute for Climate Change and the Environment's (Imperial College  
320 London) Science and Solutions for a Changing Planet Doctoral Training Partnership. We also  
321 acknowledge joint Centre funding from the UK Medical Research Council and Department for  
322 International Development [MR/R0156600/1]. We thank the organisations who published and those  
323 who collected the data that was used here, including the Nigerian Centre for Disease Control and  
324 Ministère de la Santé RDC. Finally, we acknowledge and thank Heather Whitaker (Open University)  
325 and Yonas Weldeselassie (University of Warwick) for their assistance and advice in the SCCS  
326 methodology.

### 327 **Author Bio**

328 Gina Charnley is a Postgraduate Researcher in the School of Public Health at Imperial  
329 College London. She is currently on the Science and Solutions for a Changing Planet DTP through



330 the Grantham Institute and her PhD focuses on infectious disease outbreaks during and after  
331 disasters such as natural hazards and conflict and how climate change may alter these outbreaks.

## 332 **References**

- 333 1. World Health Organization. The top 10 causes of death. [https://www.who.int/news-](https://www.who.int/news-room/fact-sheets/detail/the-top-10-causes-of-death)  
334 [room/fact-sheets/detail/the-top-10-causes-of-death](https://www.who.int/news-room/fact-sheets/detail/the-top-10-causes-of-death) (accessed September 9, 2018).
- 335 2. Nkoko DB, Giraudoux P, Plisnier PD, Tinda AM, Piarroux M, Sudre B et al. Dynamics of  
336 cholera outbreaks in Great Lakes region of Africa, 1978–2008. *Emerg Infect Dis.* 2011; 17:  
337 2026.
- 338 3. D’Mello-Guyett L, Gallandat K, Van den Bergh R, Taylor D, Bulit G, Legros D, Maes P et  
339 al. Prevention and control of cholera with household and community water, sanitation and  
340 hygiene (WASH) interventions: a scoping review of current international guidelines. *PloS*  
341 *One* 2020; 15: e0226549.
- 342 4. Leckebusch GC, Abdussalam AF. Climate and socioeconomic influences on interannual  
343 variability of cholera in Nigeria. *Health Place.* 2015; 34: 107-17.
- 344 5. Charnley GE, Kelman I, Green N, Hinsley W, Gaythorpe KA, Murray KA. Exploring  
345 relationships between drought and epidemic cholera in Africa using generalised linear  
346 models. *BMC Infect Dis.* 2021;21(1):1-2.
- 347 6. Gormley M. Untangling the causes of the 2016–18 cholera epidemic in Yemen. *Lancet Glob*  
348 *Health.* 2018; 6: e600-1.
- 349 7. Al-Salem WS, Pigott DM, Subramaniam K, Haines LR, Kelly-Hope L, Molyneux DH et al.  
350 Cutaneous leishmaniasis and conflict in Syria. *Emerg Infect Dis.* 2016; 22: 931.
- 351 8. Dureab FA, Shibib K, Al-Yousufi R, Jahn A. Yemen: cholera outbreak and the ongoing  
352 armed conflict. *J Infect Dev Ctries.* 2018; 12: 397-403.
- 353 9. Watson JT, Gayer M, Connolly MA. Epidemics after natural disasters. *Emerg Infect Dis.*  
354 2007; 13: 1.

- 355 10. Charnley GE, Kelman I, Gaythorpe KA, Murray KA. Traits and risk factors of post-disaster  
356 infectious disease outbreaks: a systematic review. *Sci Rep.* 2021; 11: 1-4.
- 357 11. Gayer M, Legros D, Formenty P, Connolly MA. Conflict and emerging infectious diseases.  
358 *Emerg Infect Dis.* 2007; 13: 1625.
- 359 12. Wells CR, Pandey A, Mbah ML, Gaüzère BA, Malvy D, Singer BH et al. The exacerbation  
360 of Ebola outbreaks by conflict in the Democratic Republic of the Congo. *PNAS.* 2019; 116:  
361 24366-72.
- 362 13. Okunlola OC, Okafor IG. Conflict–Poverty Relationship in Africa: A Disaggregated  
363 Approach. *J Interdiscip Econ.* 2020: 1-26.
- 364 14. Agbiboa D. The ongoing campaign of terror in Nigeria: Boko Haram versus the state.  
365 *Stability.* 2013; 2.
- 366 15. Council on Foreign Relations. Violence in the Democratic Republic of Congo.  
367 <https://www.cfr.org/global-conflict-tracker/conflict/violence-democratic-republic-congo>  
368 (accessed September 9, 2018).
- 369 16. Ali M, Nelson AR, Lopez AL, Sack DA. Updated global burden of cholera in endemic  
370 countries. *PLoS Negl Trop Dis.* 2015; 9: e0003832.
- 371 17. Bompangue D, Giraudoux P, Piarroux M, Mutombo G, Shamavu R, Sudre B et al. Cholera  
372 epidemics, war and disasters around Goma and Lake Kivu: an eight-year survey. *PLoS Negl*  
373 *Trop Dis.* 2009; 3: e436.
- 374 18. United Nations Statistical Division, 2015. Millennium Development Goal Indicators.  
375 <https://unstats.un.org/unsd/mdg/SeriesDetail.aspx?srid=580> (accessed September 9, 2018).
- 376 19. Blackburn CC, Lenze PE, Casey RP. Conflict and cholera: Yemen's man-made public health  
377 crisis and the global implications of weaponizing health. *Health Secur.* 2020; 18: 125-31.
- 378 20. Sato R. Effect of armed conflict on vaccination: evidence from the Boko haram insurgency  
379 in northeastern Nigeria. *Confl Health.* 2019; 13: 1-0.

- 380 21. Tijjani SJ, Ma L. Is Nigeria prepared and ready to respond to the COVID-19 pandemic in its  
381 conflict-affected northeastern states?. *Int J Equity Health*. 2020; 19: 1-4.
- 382 22. Farrington CP. Relative incidence estimation from case series for vaccine safety evaluation.  
383 *Biometrics* 1995: 228-35.
- 384 23. Brauer R, Smeeth L, Anaya-Izquierdo K, Timmis A, Denaxas SC, Farrington CP et al.  
385 Antipsychotic drugs and risks of myocardial infarction: a self-controlled case series study.  
386 *Eur Heart J*. 2015; 36: 984-92.
- 387 24. Douglas IJ, Evans SJ, Pocock S, Smeeth L. The risk of fractures associated with  
388 thiazolidinediones: a self-controlled case-series study. *PLoS Med* 2009; 6: e1000154.
- 389 25. Jean K, Raad H, Gaythorpe KA, Hamlet A, Mueller JE, Hogan D et al. Assessing the impact  
390 of preventive mass vaccination campaigns on yellow fever outbreaks in Africa: A  
391 population-level self-controlled case series study. *PLoS Med*. 2021; 18: e1003523.
- 392 26. Charnley G E C, Kelman I, Gaythorpe KAM, Murray KAM. Accessing sub-national cholera  
393 epidemiological data for Nigeria and the Democratic Republic of Congo during the seventh  
394 pandemic. *BMC Infect. Dis*. 2022; 22: 1-7.
- 395 27. HDX. The Humanitarian Data Exchange. <https://data.humdata.org> (accessed September 9,  
396 2018).
- 397 28. Ri S, Blair AH, Kim CJ, Haar RJ. Attacks on healthcare facilities as an indicator of violence  
398 against civilians in Syria: An exploratory analysis of open-source data. *PloS One* 2019; 14:  
399 e0217905.
- 400 29. Weidmann NB. A closer look at reporting bias in conflict event data. *Am J Pol Sci*. 2016;  
401 60: 206-18.
- 402 30. Petersen I, Douglas I, Whitaker H. Self controlled case series methods: an alternative to  
403 standard epidemiological study designs. *BMJ* 2016; 354.
- 404 31. Whitaker HJ, Paddy Farrington C, Spiessens B, Musonda P. Tutorial in biostatistics: the  
405 self-controlled case series method. *Stat Med*. 2006; 25: 1768-97.

- 406 32. Therneau TM, 2021. A Package for Survival Analysis in R. [https://CRAN.R-](https://CRAN.R-project.org/package=survival)  
407 [project.org/package=survival](https://CRAN.R-project.org/package=survival) (accessed 2 October 2021).
- 408 33. King AA, Ionides EL, Pascual M, Bouma MJ. Inapparent infections and cholera dynamics.  
409 *Nature* 2008; 454: 877-80.
- 410 34. Azman AS, Rudolph KE, Cummings DA, Lessler J. The incubation period of cholera: a  
411 systematic review. *J Infect.* 2013; 66: 432-8.
- 412 35. Fredrick T, Ponnaiah M, Murhekar MV, Jayaraman Y, David JK, Vadivoo S et al. Cholera  
413 outbreak linked with lack of safe water supply following a tropical cyclone in Pondicherry,  
414 India, 2012. *J Health Popul Nutr.* 2015; 33: 31.
- 415 36. Jeandron A, Saidi JM, Kapama A, Burhole M, Birembano F, Vandeveld T et al. Water  
416 supply interruptions and suspected cholera incidence: a time-series regression in the  
417 Democratic Republic of the Congo. *PLoS Med.* 2015; 12: e1001893.
- 418 37. Bhunia R, Ghosh S. Waterborne cholera outbreak following cyclone Aila in Sundarban area  
419 of West Bengal, India, 2009. *Trans R Soc Trop.* 2011; 105: 214-9.
- 420 38. Tauxe RV, Holmberg SD, Dodin A, Wells JV, Blake PA. Epidemic cholera in Mali: high  
421 mortality and multiple routes of transmission in a famine area. *Epidemiol Infect.* 1988; 100:  
422 279-289.
- 423 39. Sousa C, Hagopian A. Conflict, health care and professional perseverance: a qualitative  
424 study in the West Bank. *Glob Public Health.* 2011; 6: 520-33.
- 425 40. Cartwright EJ, Patel MK, Mbopi-Keou FX, Ayers T, Haenke B, Wagenaar BH et al.  
426 Recurrent epidemic cholera with high mortality in Cameroon: persistent challenges 40 years  
427 into the seventh pandemic. *Epidemiol Infect.* 2013; 141: 2083-93.
- 428 41. MSF. DRC: Violent attacks against staff force MSF to end projects in Fizi territory, South  
429 Kivu. [https://www.msf.org/msf-forced-pull-out-eastern-drc-territory-following-violent-](https://www.msf.org/msf-forced-pull-out-eastern-drc-territory-following-violent-attacks)  
430 [attacks](https://www.msf.org/msf-forced-pull-out-eastern-drc-territory-following-violent-attacks) (accessed September 9, 2018).

- 431 42. Nguyen VK. An epidemic of suspicion—Ebola and violence in the DRC. *N Engl J Med.*  
432 2019; 380: 1298-9.
- 433 43. Penrose K, Castro MC, Werema J, Ryan ET. Informal urban settlements and cholera risk in  
434 Dar es Salaam, Tanzania. *PLoS Negl Trop Dis.* 2010; 4: e631.
- 435 44. Fallah MP, Skrip LA, Gertler S, Yamin D, Galvani AP. Quantifying poverty as a driver of  
436 Ebola transmission. *PLoS Negl Trop Dis.* 2015; 9: e0004260.
- 437 45. Eisenstein M. Disease: poverty and pathogens. *Nature* 2016; 531: S61-3.
- 438 46. Trani JF, Bakhshi P, Noor AA, Lopez D, Mashkooor A. Poverty, vulnerability, and provision  
439 of healthcare in Afghanistan. *Soc Sci Med.* 2010; 70: 1745-55.
- 440 47. Birmingham ME, Lee LA, Ndayimirije N, Nkurikiye S, Hersh BS, Wells JG et al. Epidemic  
441 cholera in Burundi: patterns of transmission in the Great Rift Valley Lake region. *Lancet.*  
442 1997; 349: 981-5.
- 443 48. Bompangue D, Giraudoux P, Handschumacher P, Piarroux M, Sudre B, Ekwanzala M et al.  
444 Lakes as source of cholera outbreaks, Democratic Republic of Congo. *Emerg Infect Dis.*  
445 2008; 14: 798.
- 446 49. Elimian KO, Musah A, Mezue S, Oyebanji O, Yennan S, Jinadu A et al. Descriptive  
447 epidemiology of cholera outbreak in Nigeria, January–November, 2018: implications for the  
448 global roadmap strategy. *BMC Public Health* 2019; 19: 1-1.

449  
450 Address for correspondence: Gina E C Charnley, Imperial College London, School of Public  
451 Health, St. Mary's Campus, Norfolk Place, London, W2 1PG, UK; email:  
452 g.charnley19@imperial.ac.uk

453  
454  
455  
456

457 **Supporting information**

458 **S1 Information. Cholera case definitions according to the Nigerian Centre for Disease Control**  
459 **and the Ministère de la Santé Publique de la République démocratique du Congo.**

460 NCDC:

461 Suspected case: Severe dehydration or death from acute watery diarrhoea in a patient aged 5 years  
462 or more. In an epidemic situation: A suspected case in any person aged 5 years or more with acute  
463 watery diarrhoea with or without vomiting.

464 Confirmed case: A suspected case in which *Vibrio cholerae* O1 or O139 has been isolated in the  
465 stool.

466

467 RDC Ministère de la Santé:

468 Suspected case: Severe dehydration or death following acute watery diarrhoea in a patient aged 5  
469 years or more. In an epidemic situation: Acute watery diarrhoea with or without vomiting in a  
470 patient aged 1 year or more.

471

472

473

474

475

476

477

478

479

480

481

482

483 **S2 Information. Dataset information.**

484 Cholera data was compiled from a range of publicly available sources (WHO's disease outbreak  
485 news, ProMED, ReliefWeb, WHO's regional office for Africa weekly outbreak and emergencies,  
486 UNICEF cholera platform, EM-DAT, the Nigerian CDC and a literature search) in both English and  
487 French. A data charting form was used to enable a dynamic data entry process and collected data on  
488 date, geographic location, cases, deaths, hospitalisations, fatality rates, gender, age, oral cholera  
489 vaccinations, risk factors, aid and the source of the report. Data spanned from 1971-2021 for  
490 Nigeria and 1978-2021 for the DRC on a daily temporal scale and was provided at the finest spatial  
491 scale possible.

492  
493 Conflict data was provided by the United Nations Office for the Coordination of Humanitarian  
494 Affairs's Humanitarian Data Exchange (HDX, 2020). The data included sub-national conflict  
495 events for both countries on a fine spatial scale, given to the exact location in longitude/latitude.  
496 This was reported on a daily temporal scale and spanned from 1997 to 2020. The data was also  
497 categorised by event type which included battles, explosions, protests, riots, strategic developments  
498 and violence against civilians. This was further sub-categorised within these groups and reported  
499 number of fatalities.

500  
501 The study period was selected as Jan 1997 to May 2020, as these were the first and last reports in  
502 the conflict data. The spatial granularity of the analysis was to administrative level 1 (states for  
503 Nigeria and provinces for the DRC) and all data points that were reported on a finer spatial scale  
504 were attributed to the upper level. To be included in the analysis, the state/province had to report  
505 both outbreaks and conflicts during the study period, therefore 22 provinces were included for the  
506 DRC and 36 states for Nigeria.

507

508

509 **S3 Information. Sensitivity analysis.** Alternative exposure end points to identify the effect of lag.  
510 Five alternative exposure periods were tested from the original exposure period (1 week after the  
511 onset of exposure, lag 1) and were named lag periods due to the potential lag effect from conflict  
512 onset to cholera outbreaks, these included:

- 513 1. Lag 2 - Week of conflict onset + 2 weeks
- 514 2. Lag 4 - Week of conflict onset + 4 weeks
- 515 3. Lag 6 - Week of conflict onset + 6 weeks
- 516 4. Lag 8 - Week of conflict onset + 8 weeks
- 517 5. Lag 10 - Week of conflict onset + 10 weeks

518 The sensitivity analysis was run on both a national and sub-national level and S1 and S2 Figs show  
519 additional swimmer plots of lag 10 and line plots of the temporal trends.

520

521

522

523

524

525

526

527

528

529

530

531

532

533

534



535 **S4 Information. Equations used to calculate the Percentage Attributable Fraction.**

536 First the number of outbreaks attributable to conflicts,  $A_i$ , for each province  $i$ . Is estimated  
537 using the formula:

$$A_i = \lambda_i d_i^{E+} (IRR - 1) \quad (1)$$

538

539 Where  $d_i^{E+}$  is the total duration of conflict exposure for the province  $i$  (if no conflict in  
540 province  $i$ , thus  $d_i^{E+} = 0$ ),  $\lambda_i$  is the rate of outbreak occurrence in a Poisson process in the absence  
541 of conflict, and IRR is the incidence rate ratio associated with exposure to conflict. With  $N_i^{E-}$  being  
542 the number of outbreaks observed in the province  $i$  during the un-exposed period and  $T$  being the  
543 total period of observation, an estimator of  $\lambda_i$  is  $\hat{\lambda}_i = N_i^{E-} / (T - d_i^{E+})$ , which leads to:

$$\hat{A} = \sum_i \frac{N_i^{E-} d_i^{E+}}{(T - d_i^{E+})} (IRR - 1) \quad (2)$$

544

545 Based on  $\hat{A}$  and  $N$ , the total number of outbreaks observed, we can easily obtain the  
546 equivalent of the population attributable fraction,  $PAF$ , which corresponds to the proportion of the  
547 total number of outbreaks in both countries that are attributable to conflicts (this is equivalent to the  
548  $PAF$  obtained in classical epidemiological studies, but here population refers to the “population of  
549 provinces”):

$$PAF = \frac{\hat{A}}{N} \quad (3)$$

550

551

552 **S5 Information. Excluded events.** States/provinces removed as they did not report conflict and  
553 cholera in the study period (1997-2020).

554 Democratic Republic of Congo:

555 . Haut-Uele - 629 conflict events removed

556 . Kasai-Central - 234 conflict events removed

557 . Lomani - 101 conflict events removed

558 . Tshuapa - 70 conflict events removed

559

560 Nigeria:

561 . Imo - 239 conflict events removed

562

563

564

565

566

567

568

569

570

571

572

573

574

575

576

577

578 **S1 Table. The layout of the data frame used to create the pseudo-dataset for the model.** Each  
 579 new ‘end’ period represents a different sensitivity analysis and each event and exposure are given a  
 580 reference number (indiv). The example shown here is for the Democratic Republic of Congo  
 581 Conflict dataset.

| provin<br>ce | exda<br>y | eventd<br>ay | sta<br>rt | en<br>d | start<br>1 | end<br>0 | end<br>1 | end<br>2 | end<br>4 | end<br>6 | end<br>8 | end1<br>0 | indi<br>v |
|--------------|-----------|--------------|-----------|---------|------------|----------|----------|----------|----------|----------|----------|-----------|-----------|
| Bas-<br>Uele | 3         | 374          | 1         | 54<br>2 | 3          | 3        | 4        | 5        | 7        | 9        | 11       | 13        | 1         |
| Bas-<br>Uele | 4         | 374          | 1         | 54<br>2 | 4          | 4        | 5        | 6        | 8        | 10       | 12       | 14        | 2         |
| Bas-<br>Uele | 6         | 374          | 1         | 54<br>2 | 6          | 6        | 7        | 8        | 10       | 12       | 14       | 16        | 3         |
| Bas-<br>Uele | 7         | 374          | 1         | 54<br>2 | 7          | 7        | 8        | 9        | 11       | 13       | 15       | 17        | 4         |
| Bas-<br>Uele | 9         | 374          | 1         | 54<br>2 | 9          | 9        | 10       | 11       | 13       | 15       | 17       | 19        | 5         |

582

583 **S2 Table. The pseudo-dataset created from the data in S1 Table for the first two reference**  
 584 **numbers.** This data can then be fit to the model (conditional logistic regression).

| indiv | exday | eventday | start | end | event | exgr | interval | loginterval       |
|-------|-------|----------|-------|-----|-------|------|----------|-------------------|
| 1     | 3     | 374      | 1     | 3   | 0     | 0    | 2        | 0.693147180559945 |
| 1     | 3     | 374      | 3     | 13  | 0     | 1    | 10       | 2.30258509299405  |
| 1     | 3     | 374      | 13    | 542 | 1     | 0    | 529      | 6.2709884318583   |
| 2     | 4     | 374      | 1     | 4   | 0     | 0    | 3        | 1.09861228866811  |
| 2     | 4     | 374      | 4     | 14  | 0     | 1    | 10       | 2.30258509299405  |
| 2     | 4     | 374      | 14    | 542 | 1     | 0    | 528      | 6.26909628370626  |

585

586 The data (datLong) was fit to the model as follows: `clogit(event ~ exgr + strata(indiv) +`

587 `offset(loginterval), data = datLong)`

588

589

590

591

592

593

594 **S1 Figure. Swimmer plots showing the conflict dataset for lag 10 in the sensitivity analysis. In**  
 595 **relation to outbreaks (black triangles) for Nigeria (NGA) and the Democratic Republic of Congo**  
 596 **(COD).**

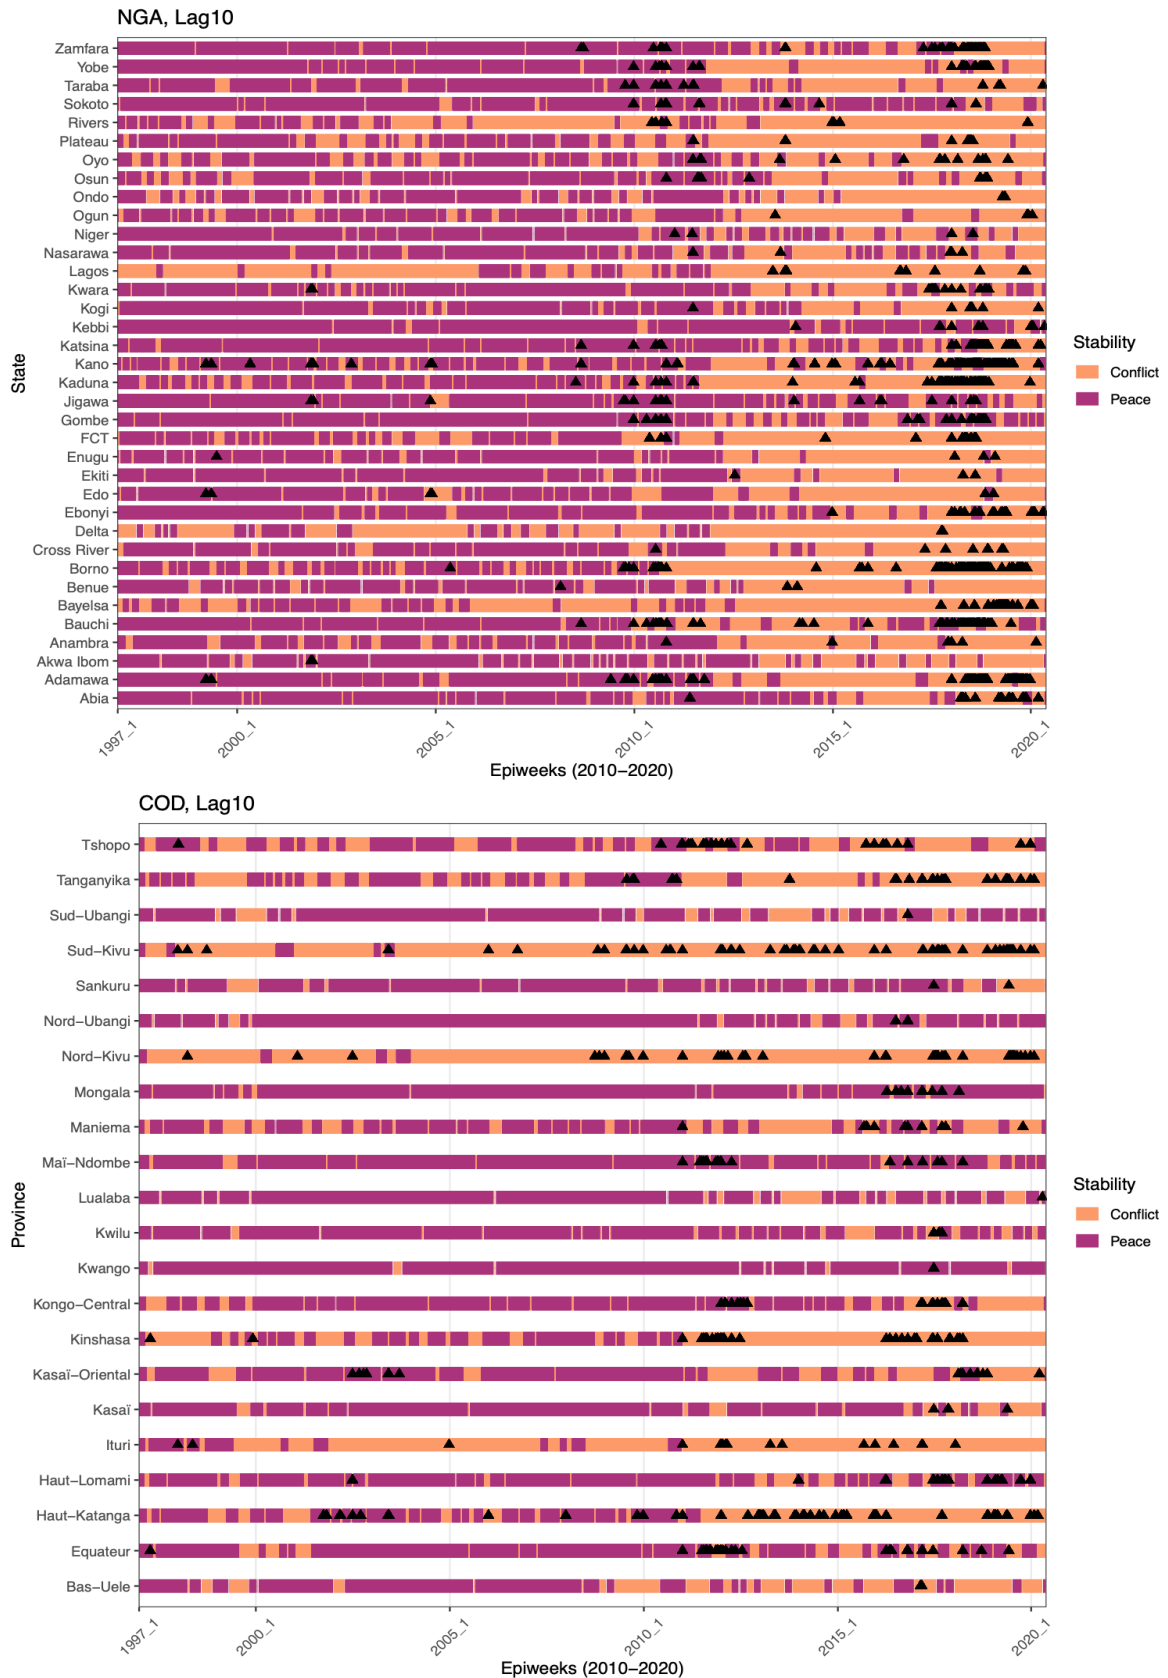

597 **S2 Figure. Number of outbreak (orange) and conflict (purple) events by year in Nigeria and**  
 598 **the Democratic Republic of Congo over the full study period.**

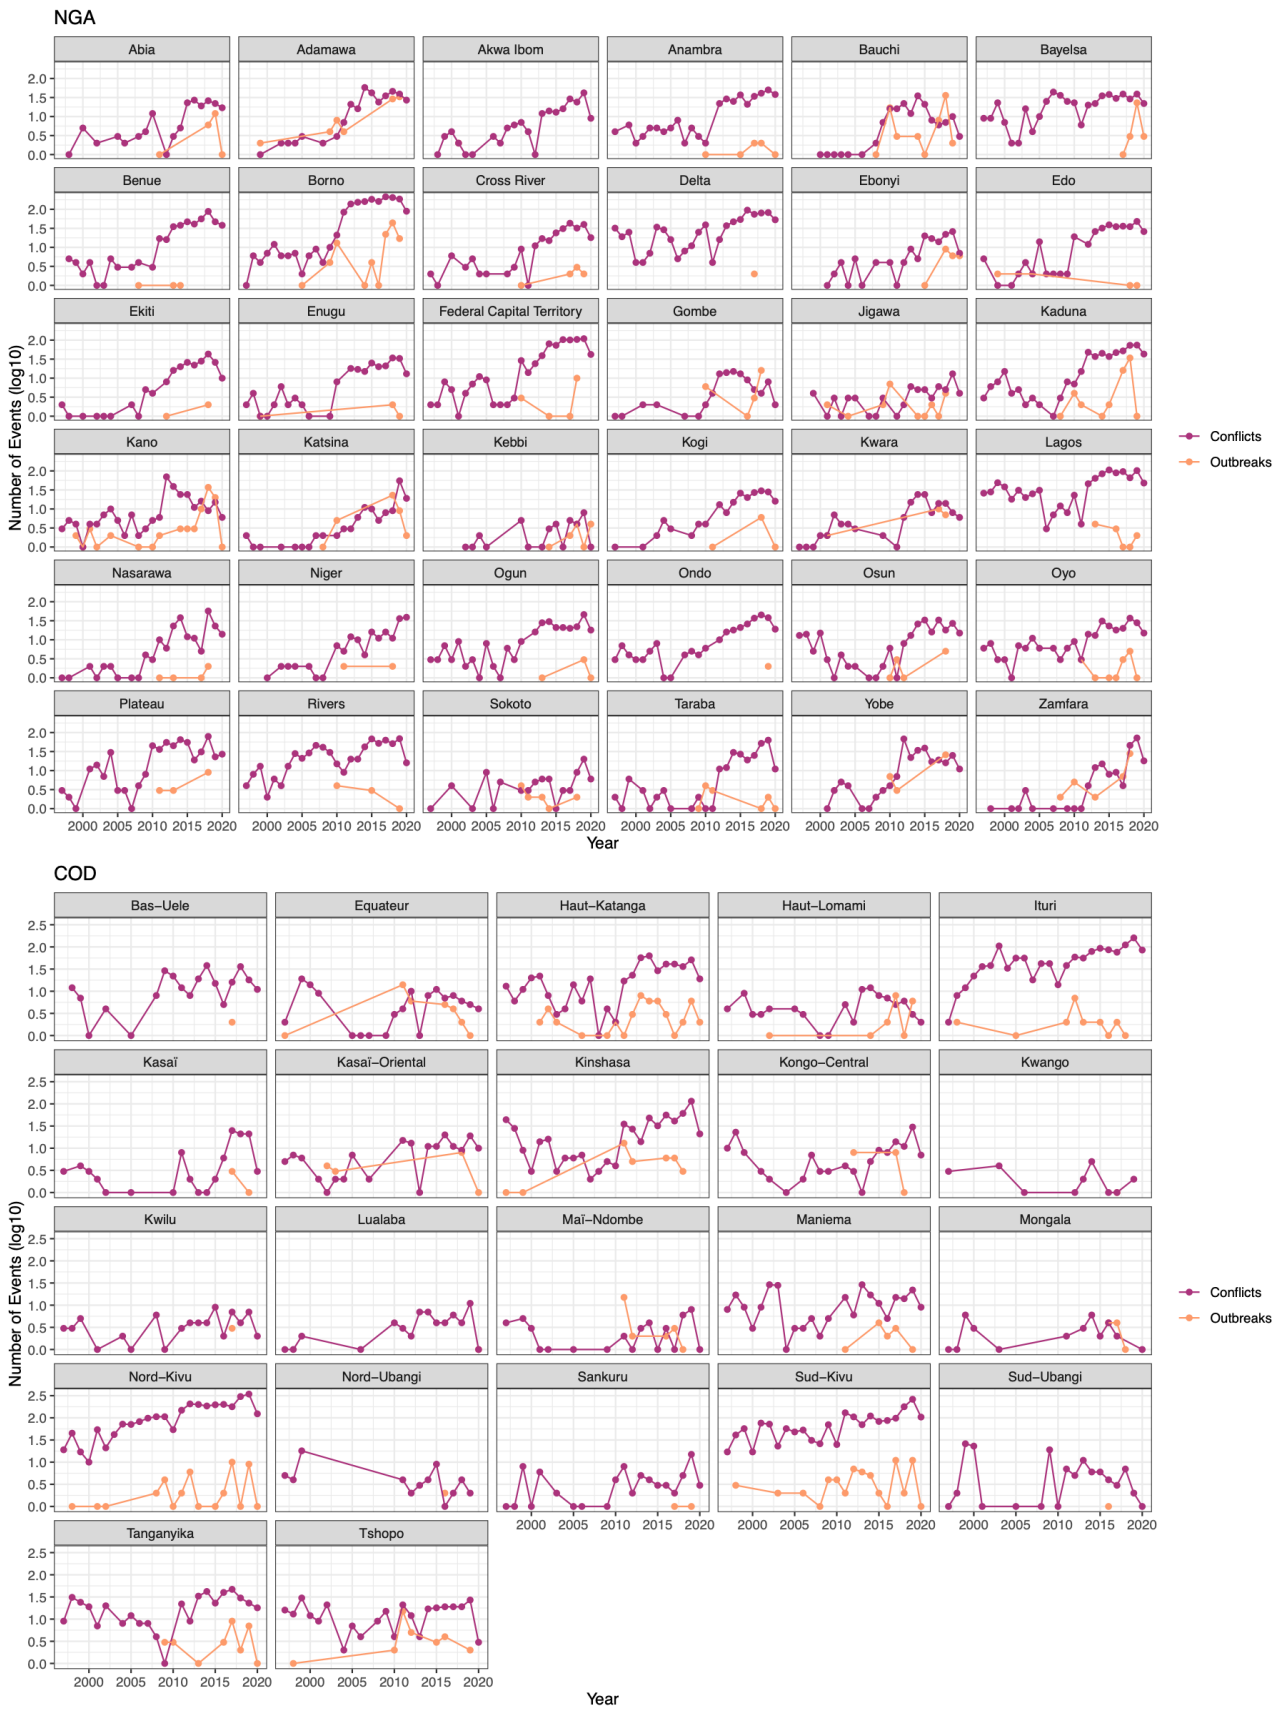

600 **S3 Figure. Poisson probability distribution fit to the outbreak data.** The simulated counts were  
601 obtained from 10,000 random realizations of a Poisson process of rate  $\lambda =$  number of total national  
602 outbreaks/number of states or provinces, for **a**, Nigeria and **b**, the Democratic Republic of Congo.  
603 Expected values are the median simulated counts from the distribution with a 95% confidence  
604 interval.

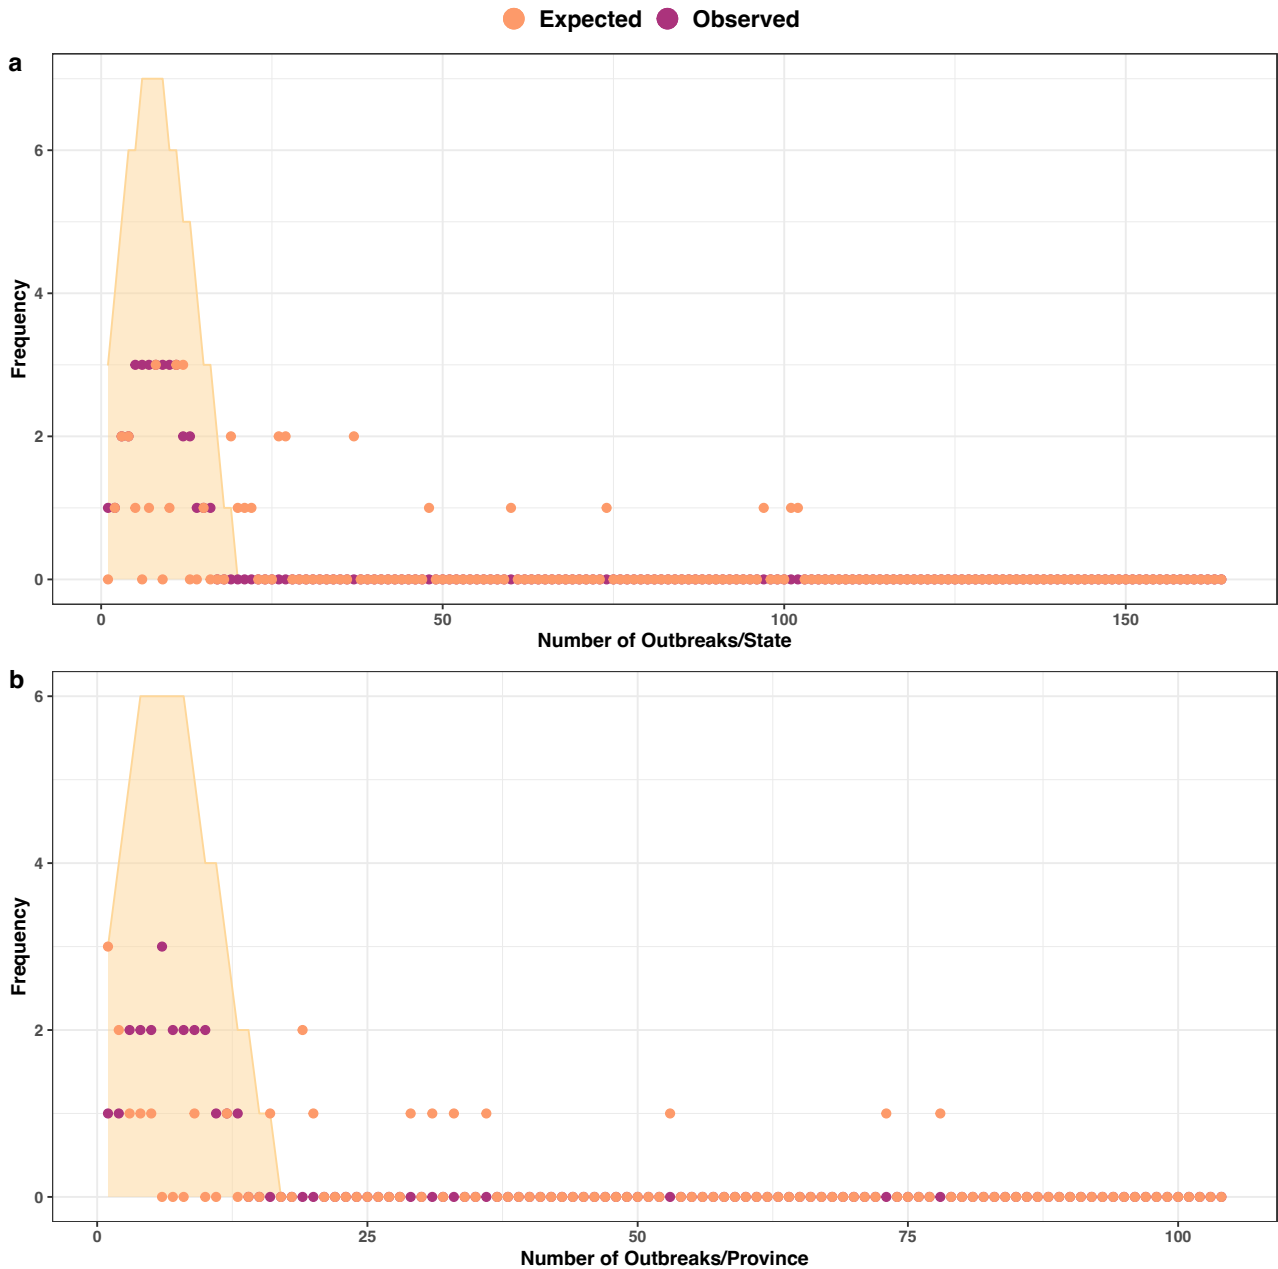

605

606

607

608 **S4 Figure. Results of national lag period sensitivity analysis.** Incidence rate ratio (IRR) for the  
609 effect of exposure to conflict within 1, 2, 4, 6, 8 and 10 weeks of the event and cholera for **a**,  
610 Nigeria and **b**, the Democratic Republic of Congo. Only results that were significant at the  
611 threshold  $p < 0.05$  are plotted here. From week 1 to week 10 the risk decreased from 3.6 to 2.08 for  
612 Nigeria and from 2.6 to 1.5 for the DRC. This suggests that the risk of conflict on cholera is highest  
613 soon after the event but remains a detectable association albeit at a lower level for potentially a long  
614 period of time after the event.  
615

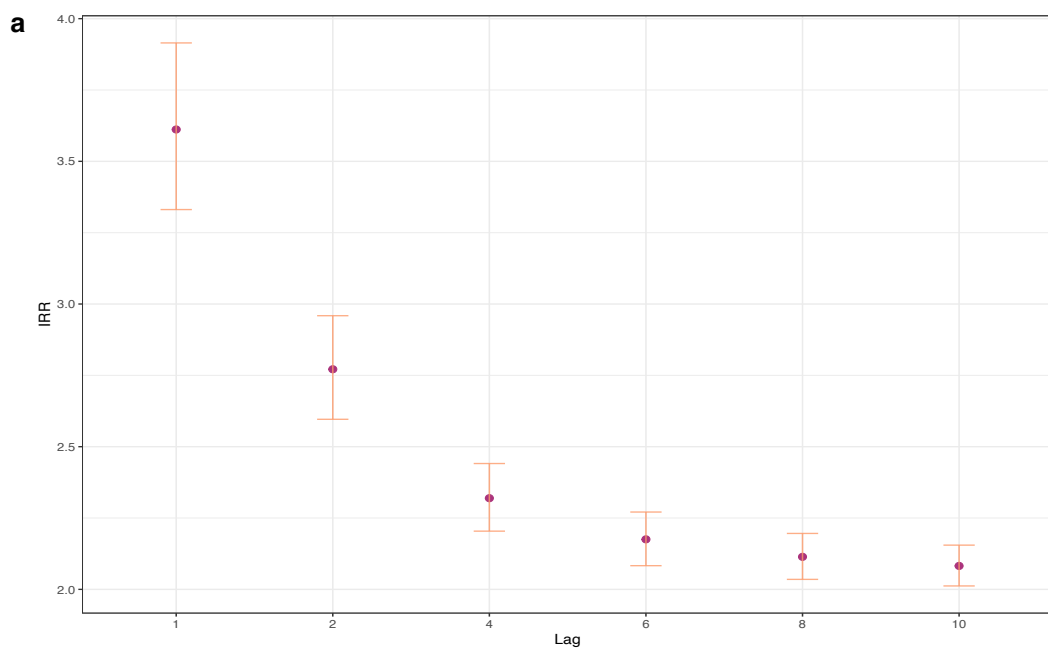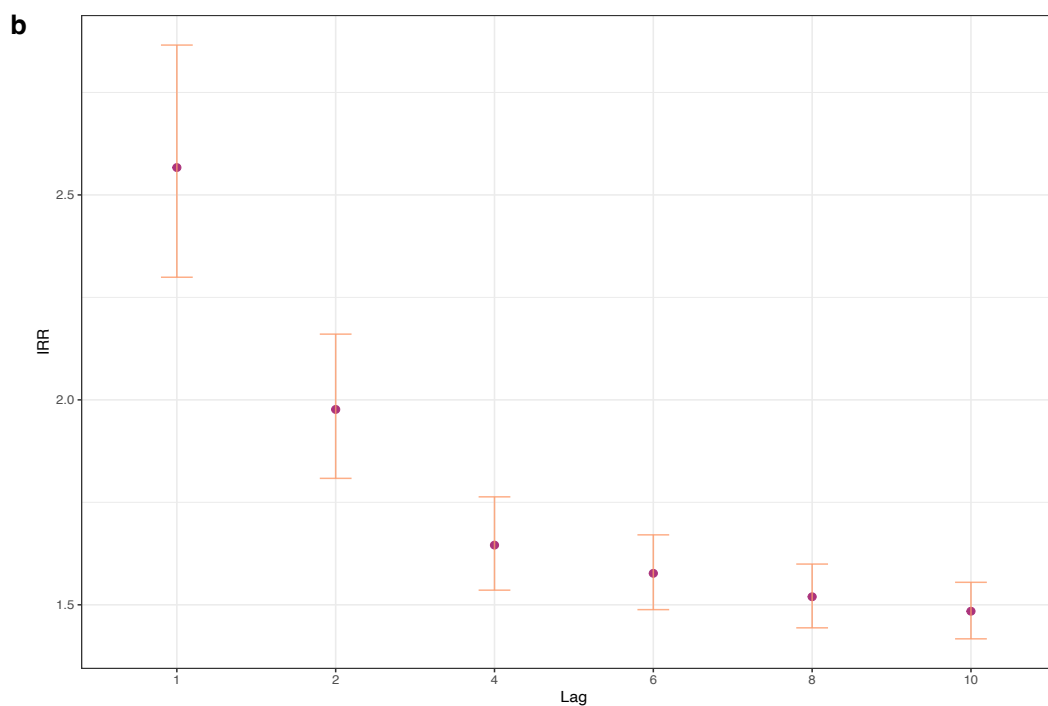

616 **S5 Figure. Results of subnational lag period sensitivity analysis.** Incidence rate ratio (IRR) for  
 617 the effect of exposure to conflict within 1, 2, 4, 6, 8 and 10 weeks of the event and cholera at  
 618 administrative level 1. For **a**, Nigeria and **b**, the Democratic Republic of Congo. Only results that  
 619 were significant at the threshold  $p \leq 0.05$  are plotted here. Thirty Nigerian states and 13 DRC  
 620 provinces were found to be significant for at least one of the lag periods and the most significant  
 621 states predominately followed the trends of the national analysis. Values ranged from Kebbi at 6.9  
 622 to 4.0 times increased risk of cholera, to Gombe at 2.4 to 1.5.  
 623

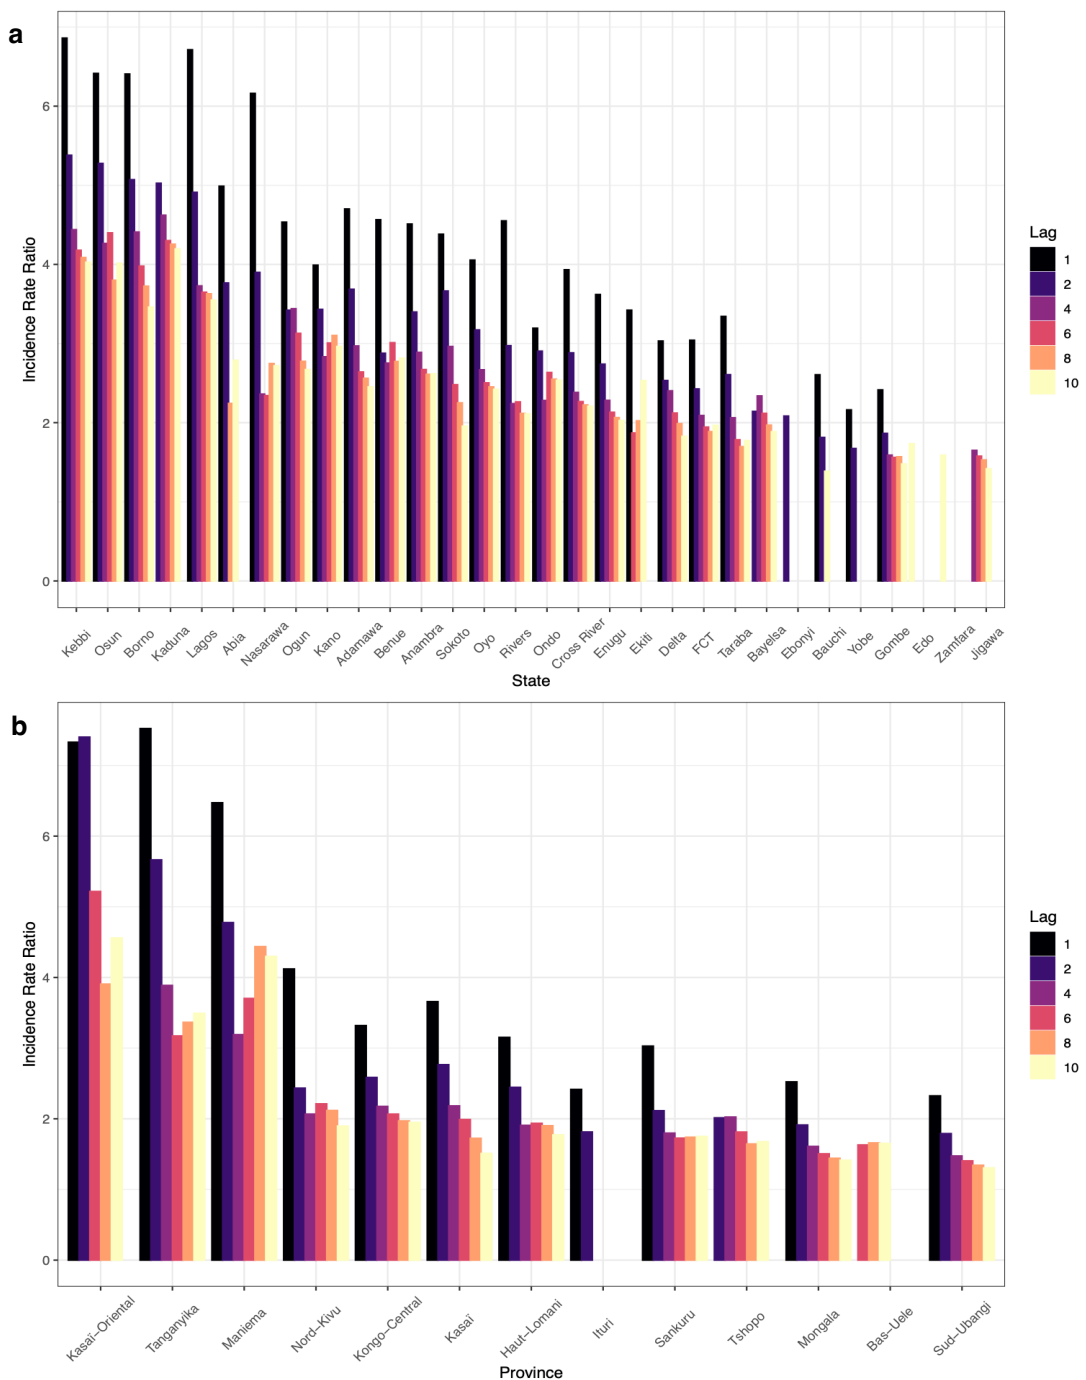



624 **S6 Figure. Results of outbreak definition sensitivity analysis.** Incidence Rate Ratio (IRR) values  
 625 and 95% confidence interval for **a**, Nigeria and **b**, the Democratic Republic of Congo for Scenario 1  
 626 removing all outbreaks within 2 weeks of each other (10 days shedding + 5 days incubation) and  
 627 Scenario 2 removing all outbreaks within 6 months of each other. Both alternative scenarios are  
 628 compared against the “Original” analysis, using the outbreak definition of 1 or more cholera cases  
 629 being reported in a specific week.

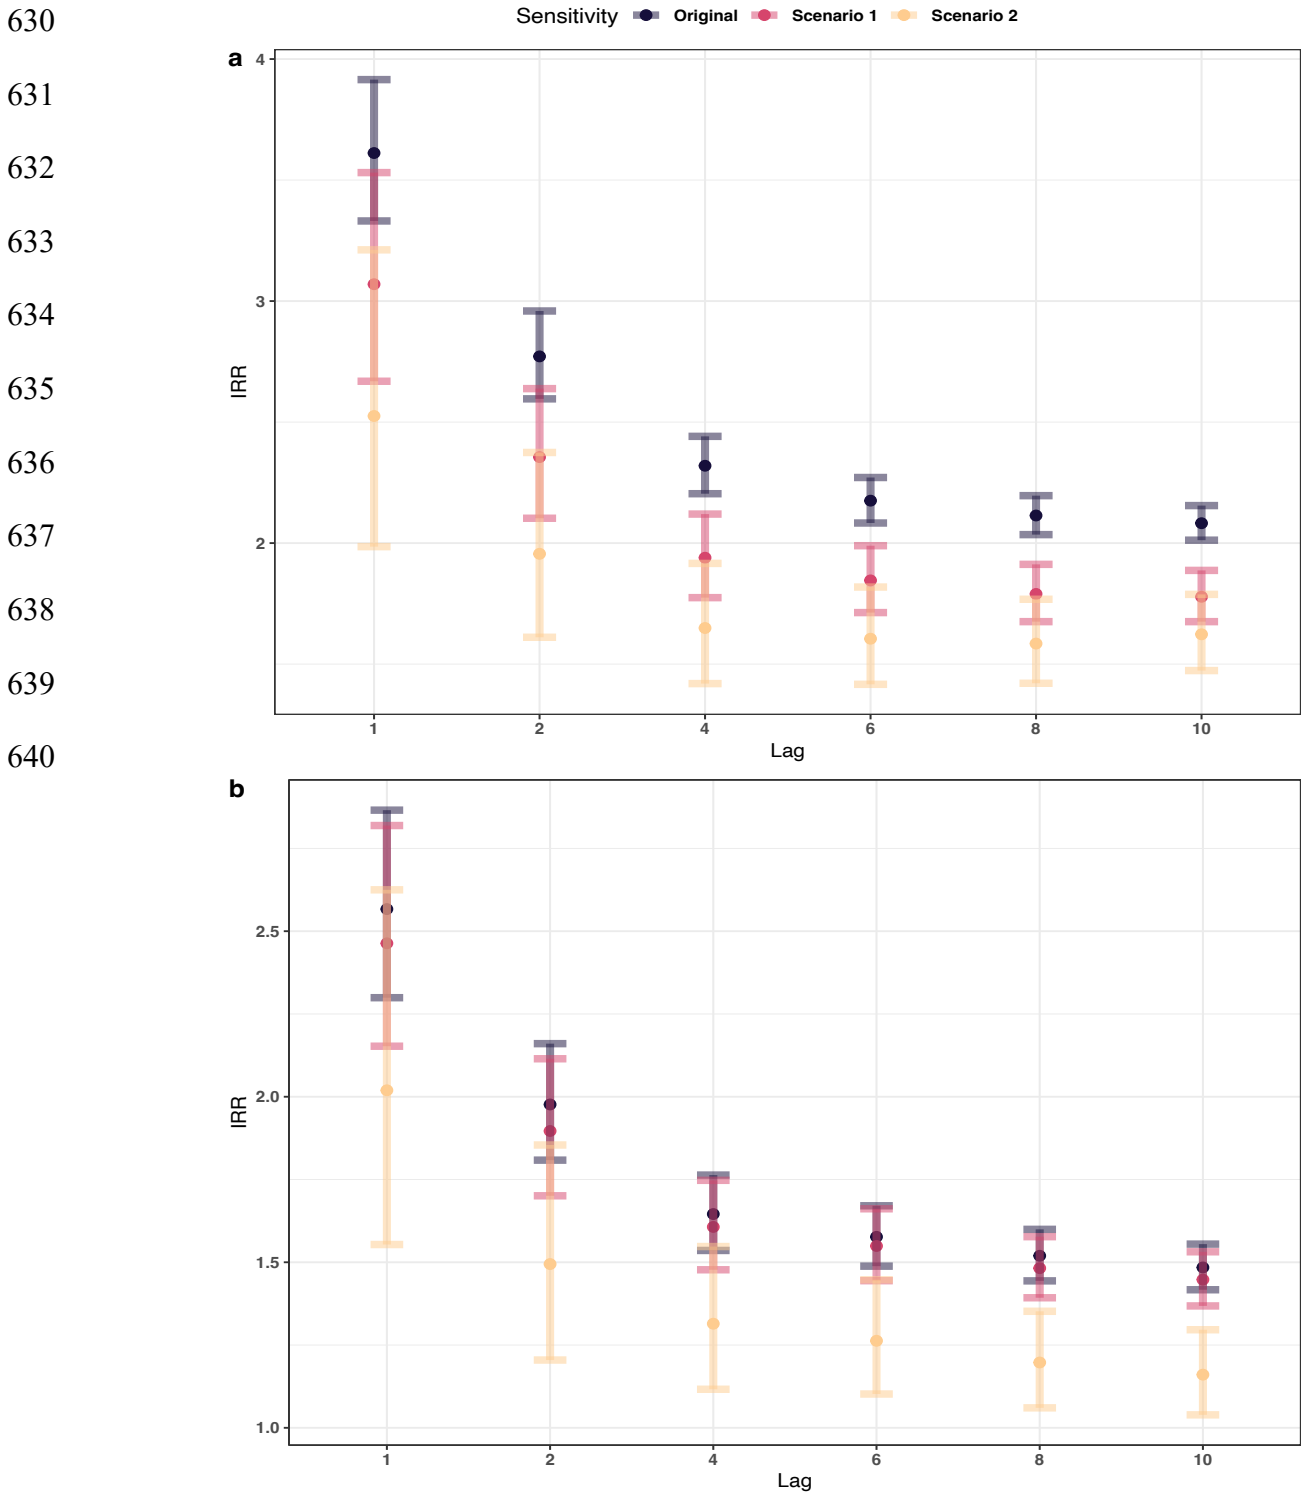

Source: https://www.medrxiv.org/content/10.1101/2021.10.19.21265191v4.full.pdf
